# Supplementary material for: Comprehensive screening of low nitrogen tolerant maize based on multiple traits at the seedling stage
Source: PeerJ. 2022 Oct 18;10:e14218. doi: 10.7717/peerj.14218 (PMC9586120; doi:10.7717/peerj.14218)
Supplement: Supplemental Information 2 — Three independent replicates were used for each trait. [file peerj-10-14218-s002.xlsx]

## Sheet: Sheet1
Cultivars	Shoot fresh weight [g·plant-1]
	-N			Average	+N			Average	NTC	A
GEMS42-I	2.3	2.37	2.4	2.35667	2.6	3.3	3	2.96667	0.794382
Ji846	0.7	0.8	0.77	0.756667	3	2.4	2.2	2.53333	0.298684
SY998	9.6	7	8.7	8.43333	9.6	8.6	8.7	8.96667	0.94052
CML223	4.2	4	4.2	4.13333	4.5	4.4	4.5	4.46667	0.925373
CML114	4.5	6.1	7.1	5.9	6.2	6.6	5.7	6.16667	0.956757
GEMS42-II	9.9	10.8	9.2	9.96667	8.4	10.2	9.2	9.26667	1.07554
Cultivars	Root fresh weight [g·plant-1]
	-N			Average	+N			Average	NTC	B
GEMS42-I	1	0.8	0.6	0.8	0.7	0.9	0.7	0.766667	1.04348
Ji846	0.3	0.4	0.3	0.333333	0.6	0.7	0.79	0.696667	0.478469
SY998	2.9	2.4	3.3	2.86667	2.1	2.1	1.7	1.96667	1.45763
CML223	1.5	1.5	1.6	1.53333	1.4	1.3	1.35	1.35	1.1358
CML114	1	1.6	2.2	1.6	1.2	1.2	1.1	1.16667	1.37143
GEMS42-II	3	3.1	3.1	3.06667	1.9	1.85	1.8	1.85	1.65766
Cultivars	Total root length [cm]
	-N			Average	+N			Average	NTC	C
GEMS42-I	502.125	505	507.646	504.924	435.773	492.691	464.2	464.221	1.08768
Ji846	261.846	217.22	239	239.355	519.171	567.88	544	543.684	0.440247
SY998	1370.55	1356.86	1386.94	1371.45	984.535	987.181	986	985.905	1.39105
CML223	686.257	775.752	800.36	754.123	673.199	683.028	678	678.076	1.11215
CML114	785.762	826.33	843.631	818.574	788.598	767.464	778	778.021	1.05212
GEMS42-II	1484.9	1408.48	1499.29	1464.22	501.746	501.689	502	501.812	2.91787
Cultivars	Average root diameter [mm]
	-N			Average	+N			Average	NTC	D
GEMS42-I	0.4048	0.4121	0.365	0.393967	0.4346	0.4684	0.4625	0.455167	0.865544
Ji846	0.4088	0.4365	0.3947	0.413333	0.4654	0.4983	0.5932	0.518967	0.796454
SY998	0.4276	0.4678	0.4582	0.4512	0.6017	0.4833	0.4807	0.5219	0.864533
CML223	0.4243	0.4545	0.4785	0.452433	0.4931	0.5276		0.51035	0.886516
CML114	0.3791	0.4787	0.4263	0.428033	0.4531	0.4529	0.4363	0.447433	0.956642
GEMS42-II	0.4668	0.4566	0.4357	0.453033	0.5394	0.5456	0.5447	0.543233	0.833957
Cultivars	Root surface [cm2]
	-N			Average	+N			Average	NTC	E
GEMS42-I	63.8526		58.2169	61.0348	59.5042	72.502	66.8147	66.2736	0.920951
Ji846	33.6296	29.7856	29.7515	31.0556	91.2813	83.2416	92	88.841	0.349564
SY998	196.643	192.671	195.653	194.989	140.875	149.473	149.095	146.481	1.33115
CML223	91.4815	110.772	120.322	107.525	90.759	103.489	110	101.416	1.06024
CML114	81.6648	94.1885	153.175	109.676		112.205	105.196	108.7	1.00898
GEMS42-II		202.018	205.222	203.62	113.618	85.9986	85.8471	95.1546	2.13988
Cultivars	Root volume [cm3]
	-N			Average	+N			Average	NTC	F
GEMS42-I	0.646	0.553	0.531	0.576667	0.647	0.849	0.657	0.717667	0.80353
Ji846	0.344	0.325	0.295	0.321333	0.713	0.912	2.108	1.24433	0.258237
SY998	1.919	2.402	2.3	2.207	2.119	1.806	1.792	1.90567	1.15812
CML223	0.97	1.259	1.439	1.22267	1.258	1.437	1.35	1.34833	0.906799
CML114	0.974	1.327	1.233	1.178	1.27	1.27	1.147	1.229	0.958503
GEMS42-II	1.93	2.306	2.235	2.157	1.532	1.173	1.169	1.29133	1.67037
Cultivars	Root nitrate content [µg·g-1 FW]
	-N			Average	+N			Average	NTC	G
GEMS42-I	29.7619	39.2857	34.5	34.5159	85.7143	84.5238	85	85.0794	0.40569
Ji846	22.619	35.7143	29	29.1111	130.952	123.81	127	127.254	0.228764
SY998	47.619	50	49	48.873	117.857	123.81	120	120.556	0.405398
CML223	23.8095	26.1905	25	25	91.6667	76.1905	84	83.9524	0.297788
CML114	26.1905	35.7143	31	30.9683	90.4762	91.6667	91	91.0476	0.340132
GEMS42-II	28.5714	29.7619	29	29.1111	76.1905	70.2381	73	73.1429	0.398003
Cultivars	Shoot nitrate content [µg·g-1 FW]
	-N			Average	+N			Average	NTC	H
GEMS42-I	16.6667	14.2857	15.5	15.4841	40.4762	42.8571	41	41.4444	0.373612
Ji846	21.4286	20.4286	22	21.2857	64.2857	78.5714	71	71.2857	0.298597
SY998	27.381	25	26	26.127	75	57.1429	66	66.0476	0.395578
CML223	15.4762	14.2857	15	14.9206	44.0476	38.0952	41	41.0476	0.363496
CML114	14.2857	10.7143	13	12.6667	63.0952	67.8571	65	65.3175	0.193925
GEMS42-II	11.9048	20.2381	16	16.0476	42.8571	57.1429	50	50	0.320952
Cultivars	Root ammonium content [µg·g-1 FW]
	-N			Average	+N			Average	NTC	I
GEMS42-I	17.5947	16.5326	17	17.0424	27.0293	25.5001	26	26.1765	0.651059
Ji846	4.09922	4.09922	4	4.06615	9.5294	11.1377	10	10.2224	0.397769
SY998	11.4412	11.0425	11	11.1612	21.9917	21.2294	22	21.7404	0.513388
CML223	8.40616	8.05147	8.2	8.21921	17.4103	17.7998	18	17.7367	0.463401
CML114	7.63229	8.001	7.8	7.8111	15.7745	15.0842	15	15.2862	0.51099
GEMS42-II	6.27206	6.98077	6.6	6.61761	15.8096	16.8706	16	16.2267	0.407821
Cultivars	Shoot ammonium content [µg·g-1 FW]
	-N			Average	+N			Average	NTC	J
GEMS42-I	12.1942	11.8095	12	12.0012	16.7309	15.9284	16	16.2198	0.739914
Ji846	3.24627	3.04627	3.5	3.26418	7.05607	6.65742	6.9	6.87116	0.475055
SY998	6.20722	6.55791	6.4	6.38837	13.0329	12.9615	13	12.9981	0.491484
CML223	5.84652	6.21891	6	6.02181	10.0838	12.1919	11.1	11.1252	0.541276
CML114	5.7321	5.5321	6	5.75474	11.6192	10.2997	11	10.973	0.524447
GEMS42-II	4.93112	5.3194	5.1	5.11684	10.7736	11.4493	11	11.0743	0.462046
Cultivars	Relateve expression level of ZmNRT2;1
	-N			Average	+N			Average	NTC	K
GEMS42-I	1.4914	1.01162	0.827406	1.11014	0.878633	0.749154	0.73884	0.788876	1.40725
Ji846	8.69388	8.51496	8.6	8.60295	1.03288	0.997692	0.97041	1.00033	8.60014
SY998	3	3.27918	2.71948	2.99955	1.83401	0.843816	0.367292	1.01504	2.95511
CML223	0.178831	0.194342	2.21402	0.862397	0.514057	0.628507	0.6	0.580855	1.4847
CML114	0.526088	0.466868	0.502923	0.498626	0.313528	0.542113	0.44	0.431881	1.15455
GEMS42-II	0.600756	0.665478	0.712219	0.659484	0.423373	0.532185	0.5	0.485186	1.35924
Cultivars	Relateve expression level of ZmNRT2;2 in root
	-N			Average	+N			Average	NTC	L
GEMS42-I	1.1	1.29831	0.943979	1.1141	0.6	0.635075	0.534033	0.589703	1.88925
Ji846	42.8137	40.2244	41	41.346	1.14605	0.997692	0.874583	1.00611	41.0951
SY998	12.5244	10.315	11	11.2798	1.12766	1.11987	0.981686	1.07641	10.4791
CML223	0.926849	0.853413	0.991224	0.923829	0.2	0.163899	0.251111	0.205003	4.50641
CML114	0.173573	0.15	0.155243	0.159605	0.0417129	0.0150018	0.0195955	0.0254367	6.2746
GEMS42-II	0.038928	0.05	0.0738608	0.0542629	0.0350769	0.0241473	0.019	0.0260747	2.08105
Cultivars	Relateve expression level of ZmAMT1;1 in root
	-N			Average	+N			Average	NTC	M
GEMS42-I	1.79834	1.74917	1.60956	1.71902	0.122286	0.104991	0.104265	0.110514	15.5548
Ji846	9.9406	9.87194	10	9.93751	1.07177	1.03526	0.90125	1.00276	9.91013
SY998	6.02099	5.57897	5.8	5.79999	0.347881	0.322343	0.186425	0.28555	20.3117
CML223	1.72907	1.4	1.04972	1.39293	0.848704	1.09682	0.854607	0.933379	1.49235
CML114	0.6	0.614152	0.581023	0.598391	0.384219	0.641713	0.668964	0.564965	1.05917
GEMS42-II	2.8481	4.08405	2.80889	3.24701	1.03766	1.2	1.41748	1.21838	2.66502
Cultivars	Relateve expression level of ZmAMT1;3 in root
	-N			Average	+N			Average	NTC	N
GEMS42-I	0.413703	0.365177	0.331405	0.370095	0.35	0.363073	0.343488	0.352187	1.05085
Ji846	1.15136	0.954842	0.909618	1.00527	0.812252	0.479632	0.479632	0.590506	1.70239
SY998	0.408951	0.255253	0.233258	0.299154	0.280616	0.274841	0.263645	0.273034	1.09567
CML223	1.65864	1.61328	1.65864	1.64352	0.361817	0.427304	0.356836	0.381986	4.30257
CML114	0.700602	0.530957	0.622725	0.618095	0.41466	0.432269	0.517632	0.454854	1.35889
GEMS42-II	0.387786	0.374577	0.439317	0.40056	0.204476	0.225313	0.266093	0.23196	1.72685
Cultivars	NR activity [µg NO2-·g-1 FW·h-1]
	-N			Average	+N			Average	NTC	O
GEMS42-I	7.77149	9.04031	8.4	8.40393	19.912	22.4206	21	21.1109	0.398085
Ji846	3.55048	8.28445	6	5.94498	31.5097	33.2481	32	32.2526	0.184326
SY998	6.80088	6.16824	6.5	6.48971	6.79818	9.96012	8.4	8.3861	0.773865
CML223	3.92201	2.03944	3	2.98715	8.4298	10.5821	9.5	9.50397	0.314306
CML114	6.22522	8.14067	7.2	7.18863	14.9213	13.0365	14	13.9859	0.51399
GEMS42-II	6.80088	4.90296	5.9	5.86795	8.04855	6.78603	7.5	7.44486	0.788188
Cultivars	GS activity [µmol GHA·g-1 FW·h-1]
	-N			Average	+N			Average	NTC	P
GEMS42-I	8.84245	8.16227	8.5	8.50157	8.98682	10.4846	9.7	9.72382	0.874304
Ji846	1.65365	1.21268	1.4	1.42211	12.4805	12.0779	12.2	12.2528	0.116064
SY998	2.67503	3.24825	3	2.97443	5.09097	4.57324	4.8	4.8214	0.616921
CML223	1.92008	2.13342	2	2.01783	2.9828	2.56852	2.8	2.78377	0.724854
CML114	2.80144	2.66643	2.7	2.72263	5.91181	6.95507	6.4	6.4223	0.423933
GEMS42-II	2.03094	2.24932	2.1	2.12676	3.55328	3.33793	3.5	3.46374	0.614006
Cultivars	GOGAT activity [µmol NADH·g-1 FW·h-1]
	-N			Average	+N			Average	NTC	Q
GEMS42-I	15.1899	12.6582	14	13.9494	16.3488	16.5488	16	16.2992	0.855832
Ji846	13.4228	13.4529	13.4	13.4252	13.8158	17.7632	15.8	15.793	0.850077
SY998	9.92063	11.9048	11	10.9418	11.0132	13.2159	12.1	12.1097	0.903557
CML223	6.60429	6.80429	6.4	6.60286	14.2096	15.9858	15	15.0651	0.438288
CML114	10.4712	10.4621	10.5	10.4778	10.5758	12.3384	11.5	11.4714	0.913381
GEMS42-II	9.20952	9.1954	9.1	9.16831	15.5709	15.5709	15.6	15.5806	0.588443
Cultivars	NTC value for principal component analysis (PCA)
	A	B	C	D	E	F	G	H	I	J	K	L	M	N	O	P	Q
GEMS42-I	0.794382	1.04348	1.40725	1.88925	15.5548	1.05085	1.08768	0.865544	0.920951	0.80353	0.373612	0.40569	0.739914	0.651059	0.398085	0.874304	0.855832
Ji846	0.298684	0.478469	8.60014	41.0951	9.91013	1.70239	0.440247	0.796454	0.349564	0.258237	0.298597	0.228764	0.475055	0.397769	0.184326	0.116064	0.850077
SY998	0.94052	1.45763	2.95511	10.4791	20.3117	1.09567	1.39105	0.864533	1.33115	1.15812	0.395578	0.405398	0.491484	0.513388	0.773865	0.616921	0.903557
CML223	0.925373	1.1358	1.4847	4.50641	1.49235	4.30257	1.11215	0.886516	1.06024	0.906799	0.363496	0.297788	0.541276	0.463401	0.314306	0.724854	0.438288
CML114	0.956757	1.37143	1.15455	6.2746	1.05917	1.35889	1.05212	0.956642	1.00898	0.958503	0.193925	0.340132	0.524447	0.51099	0.51399	0.423933	0.913381
GEMS42-II	1.07554	1.65766	1.35924	2.08105	2.66502	1.72685	2.91787	0.833957	2.13988	1.67037	0.320952	0.398003	0.462046	0.407821	0.788188	0.614006	0.588443
Eigenvector, eigenvalues, contribution rate, and accumulative contribution rate of the first four principal components based on the NTC
	Principal component
	1	2	3	4
Eignvalues	8.054	3.676	2.627	2.091
Contribution rate (%)	47.376	21.622	15.455	12.299
Accumulative contribution rate (%)	47.376	68.997	84.453	96.751
A	0.33987	-0.0526673	-0.0946033	-0.0774169
B	0.334627	-0.0835219	0.0777457	-0.131043
C	0.0631655	0.167228	0.147305	0.599819
D	0.0896235	0.48921	-0.134747	-0.045386
E	0.0238299	0.440471	-0.23671	0.11403
F	-0.314827	-0.0796576	0.250309	0.081239
G	-0.324479	-0.0991415	0.209326	0.00456757
H	-0.0378679	0.369322	0.359908	0.188342
I	-0.0113306	-0.256262	-0.425645	0.3306
J	0.284465	-0.203338	0.190293	0.0789289
K	0.12183	0.0962291	-0.375381	-0.434645
L	0.313811	-0.179133	0.160232	0.0568678
M	0.330282	-0.145631	0.126628	-0.0018993
N	0.301166	0.226676	0.173533	-7.37203e-05
O	0.287735	-0.046881	0.327702	-0.0996074
P	0.257819	0.241355	-0.184	0.277674
Q	-0.103213	0.308027	0.286181	-0.406304
